# Supplementary material
Source: PubMed Central journal article supplement (PMC4237020)
Supplement: NIHMS641965-supplement-Supplement_1.pdf [file NIHMS641965-supplement-Supplement_1.pdf]

## Supplementary Online Content

Kumar KR, Lohmann K, Masuho I, et al. Mutations in *GNAL*: a novel cause of craniocervical dystonia. *JAMA Neurol*. Published online February 17, 2014.  
doi:10.1001/jamaneurol.2013.4677.

**eTable 1.** Primers used in *GNAL* study

**eTable 2.** Results of software analyses

**eMethods.** Bioluminescence energy transfer assay and quantitative duplex polymerase chain reaction assay

**eReferences.**

This supplementary material has been provided by the authors to give readers additional information about their work.

**eTable 1.** Primers used in *GNAL* study

| Exon                    | Forward Primer           | Reverse Primer          | Annealing temperature |
|-------------------------|--------------------------|-------------------------|-----------------------|
| NM_001142339_ex1*       | GGAGCCGTCGCAGGAGCCG      | TTAAACCCATTGACGTGCA     | 58                    |
| ex2                     | GGATTGCTCAGACCCGGCT      | ATTGTTTAGAGAAAGCACT     | 57                    |
| ex3-4                   | ATGTCTTGGGGTTGATACTG     | GCATTTAGAGAGCTGGATTTTCG | 55                    |
| ex5                     | CTATGCAGACTTCCACAAA      | TGCACTCAAGAACTTCAG      | 55                    |
| ex6                     | TGCTGTACTTGGGTGATGTC     | AAGGCACAAGGTTTGATGAC    | 55                    |
| ex7                     | CATGCTCGGCCAATGTTGG      | AGTAGGCAGTAAAATCAAC     | 55                    |
| ex8                     | TGCTGTCTGCTTGATCTGTC     | ACTCCTGACTTCAGGTTATCCG  | 60                    |
| ex9                     | CAGGCTGTTCTGTGACTGA      | CAGGCTAGTCTCCAAGTCT     | 55                    |
| ex10                    | GGAATGAGGATACTGGTGTACTG  | GGGATCCGATTACAAATAGGAC  | 55                    |
| ex11                    | GCTGGGAATATACAGCAGTCTAAC | CCTTGGGTGAGAAATCTAACC   | 55                    |
| ex12                    | CATTCTGCCTCTAAGTGC       | ACTGTGTTTTCTCCCCATCTAC  | 55                    |
| cDNA_ex4(F),<br>ex12(R) | TAGCCCCTATCACTGACT TTG   | CCTCACAAGAGCTCATACTGC   | 60                    |
| Ex9_qPCR                | GCTTTCCTTTTTCTCCCCA      | AATTTGCTATTTTTGTCAC     | 55                    |
| $\beta$ globin_qPCR     | ACACAAGTGTTCCTACTAGC     | CAACTTCATCCACGTTCCACC   | 55                    |

\*A GC rich kit (GC Rich PCR system, Roche Diagnostics GmbH, Mannheim, Germany) was used for sequencing of this exon.

**eTable 2.** Results of software analyses.\*

| Patient     | Genomic change | Protein change | Polyphen-2 <sup>4</sup>                                                      | Mutation Taster <sup>5</sup> | SIFT <sup>6</sup> |
|-------------|----------------|----------------|------------------------------------------------------------------------------|------------------------------|-------------------|
| L4486       | c.637G>A       | p.Gly213Ser    | Probably damaging with a score of 0.999 (sensitivity 0.14; specificity 0.99) | Disease causing              | Damaging          |
| L1589       | c.931G>A       | p.Ala311Thr    | Benign with a score of 0.299 (sensitivity 0.91; specificity 0.89)            | Disease causing              | Damaging          |
| DYT_family7 | c.1057G>A      | p.Ala353Thr    | Probably damaging with a score of 1.000 (sensitivity 0.00; specificity 1.00) | Disease causing              | Damaging          |

\*We used the Ensembl transcript ID [ENST00000423027](#) and protein ID [ENSP00000408489](#) for the software analyses.

## **eMethods. Bioluminescence energy transfer assay and quantitative duplex polymerase chain reaction assay**

### **Bioluminescence energy transfer assay**

#### Genetic Constructs

masGRK3-Nluc construct contained amino acids G495-L688 of bovine GRK3 (NP\_776925), preceded by a myristic acid attachment peptide (mas; MGSSKSKTSNS). The stop codon of GRK3 was replaced with a GGGS linker, which was followed by the NanoLuc.<sup>1</sup>

#### Analysis of $G_{\alpha\beta\gamma}$ trimer formation and D1-Golf coupling by fast kinetic BRET assay

$G_{\alpha_{\text{olf}}}$  function in living cells was analyzed by monitoring the kinetics of its association and dissociation with  $G\beta 1\gamma 2$  subunits following activation of D1R by agonist. The assay measures agonist-dependent changes in bioluminescence resonance energy transfer (BRET) between  $G\beta 1\gamma 2$  tagged with Venus and its effector GRK3 tagged with Nluc and was conducted as previously described<sup>2</sup>. Briefly, N-terminal 3xHA-tagged dopamine  $D_1$  receptor,  $G_{\alpha_{\text{olf}}}$ , Venus156-239- $G\beta 1$ , Venus1-155- $G\gamma 2$ , masGRK3ct-Nluc, and Flag-tagged Ric-8B constructs were transfected into HEK293T/17 cells at a 1:6:1:1:1:2 ratio with 5  $\mu\text{g}$  total DNA delivered per  $4 \times 10^6$  cells. 16 h post transfection cells were stimulated with 10  $\mu\text{M}$  dopamine followed by treatment with 100  $\mu\text{M}$  haloperidol that has reported 63 nM Kd for D1 receptor<sup>3</sup>. Stimulation of the D1R by dopamine results in the dissociation of  $G_{\alpha_{\text{olf}}}$  from the heterotrimer. Released  $G\beta\gamma$  subunits tagged with Venus become available for the interaction with Nluc-tagged GRK3ct reporter producing the BRET signal which is determined by the change in the emission ratio at wavelengths 535 nm and 475 nm. Mean BRET ratios were calculated from 4 wells per condition. One-way ANOVA followed by the Holm-Sidak method was performed to determine statistically significant differences relative to wild-type control. Similar results were obtained from two independent experiments.

### Quantitative duplex polymerase chain reaction assay

To screen for whole gene deletions/duplications, a quantitative polymerase chain reaction (qPCR) assay was performed on a LightCycler 480 (Roche Diagnostics, Mannheim, Germany). We amplified exon 9 of *GNAL* and a reference gene, *β globin*, using a LightCycler Fast start DNA Master plus SYBR Green I kit (Roche Diagnostics GmbH, Mannheim, Germany, primers listed below). A relative ratio (concentration of *GNAL* exon 9: *β globin*) between 0.8 and 1.2 was considered normal; a ratio between 0.4 and 0.6 would have suggested a heterozygous deletion; and a ratio of 1.3 and 1.7 would have indicated a heterozygous duplication.

## eReferences

1. Hall MP, Unch J, Binkowski BF, et al. Engineered luciferase reporter from a deep sea shrimp utilizing a novel imidazopyrazinone substrate. *ACS Chem Biol* 2012;7:1848-1857.
2. Hollins B, Kuravi S, Digby GJ, Lambert NA. The c-terminus of GRK3 indicates rapid dissociation of G protein heterotrimers. *Cell Signal* 2009;21:1015-1021.
3. Niznik HB, Otsuka NY, Dumbrille-Ross A, Grigoriadis D, Tirpak A, Seeman P. Dopamine D1 receptors characterized with [3H]SCH 23390. Solubilization of a guanine nucleotide-sensitive form of the receptor. *J Biol Chem* 1986;261:8397-8406.
4. Adzhubei IA, Schmidt S, Peshkin L, et al. A method and server for predicting damaging missense mutations. *Nature methods* 2010;7:248-249.
5. Schwarz JM, Rodelsperger C, Schuelke M, Seelow D. MutationTaster evaluates disease-causing potential of sequence alterations. *Nature methods* 2010;7:575-576.
6. Kumar P, Henikoff S, Ng PC. Predicting the effects of coding non-synonymous variants on protein function using the SIFT algorithm. *Nature protocols* 2009;4:1073-1081.
